# Supplementary material for: A Synergistic Effect of Chitosan and Lactic Acid Bacteria on the Control of Cruciferous Vegetable Diseases
Source: PubMed Central journal article supplement — Plant Pathol J. 2020 Apr 1;36(2):157–69. doi: 10.5423/PPJ.OA.01.2020.0004 (PMC7143521; doi:10.5423/ppj.oa.01.2020.0004), 2020-04-01
Supplement: PPJ-36-157_Supple.pdf [file PPJ-36-157_Supple.pdf]

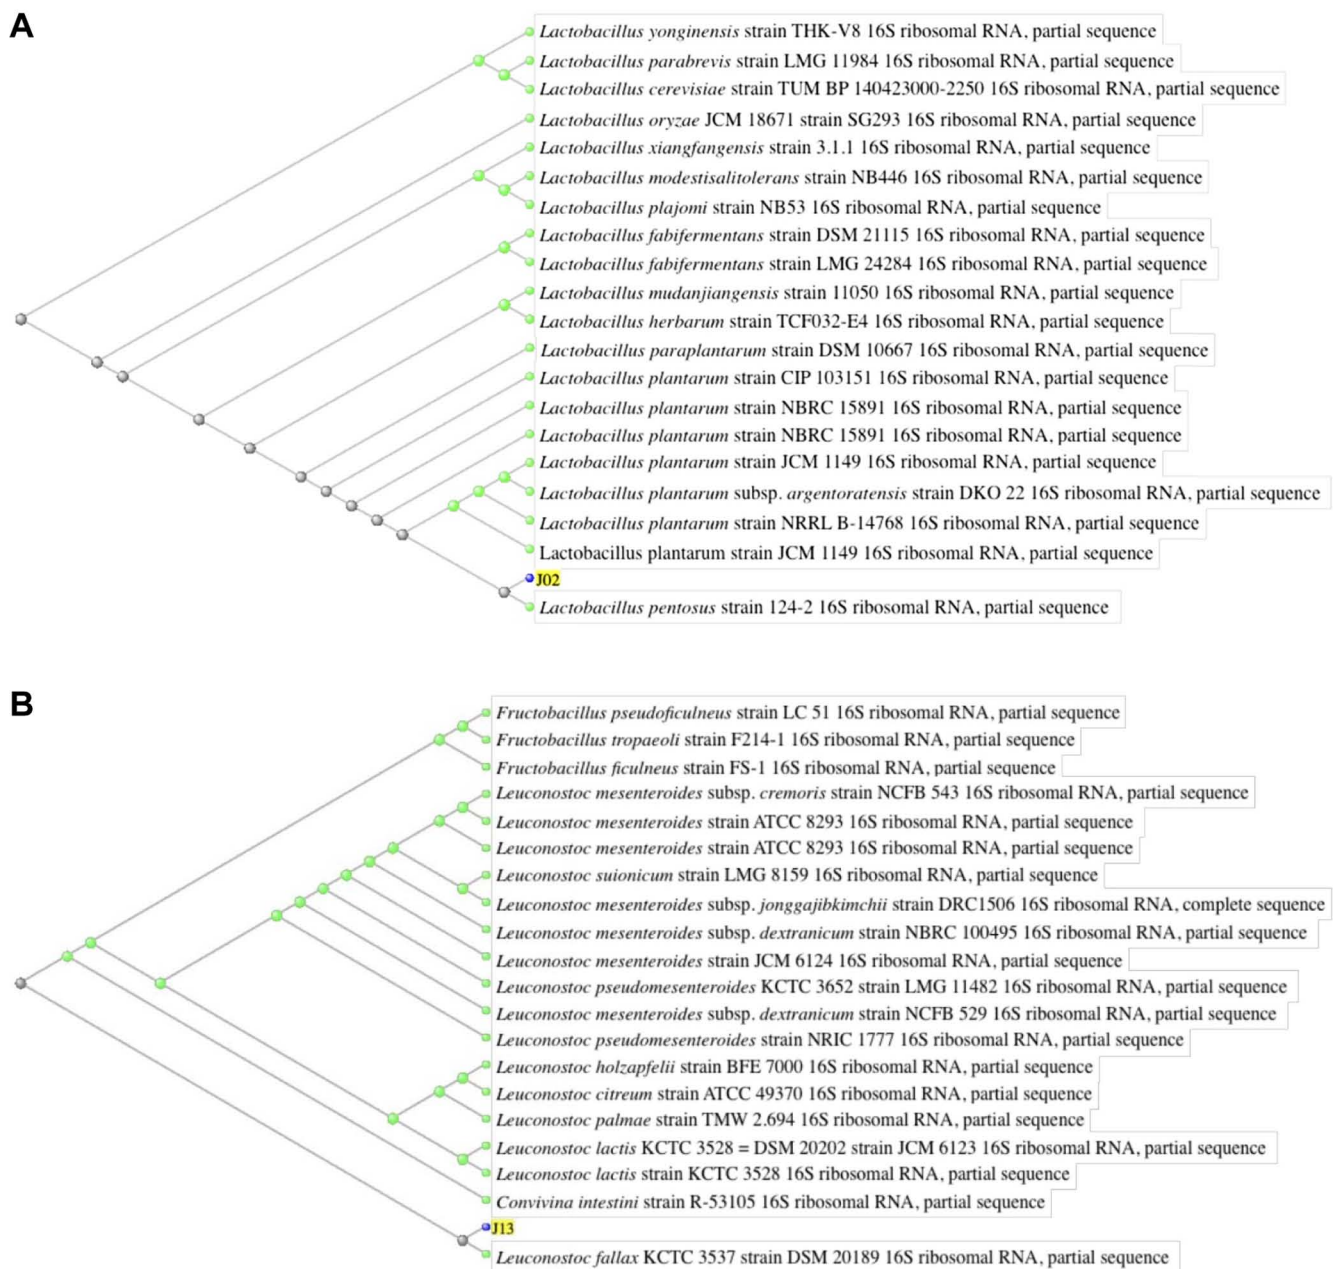

**Supplementary Fig. 1.** (A) Phylogenetic analysis of 16S rRNA gene sequences among J02 and other *Lactobacillus* spp., revealing that J02 is closely related to *Lactobacillus pentosus*. (B) Phylogenetic analysis of 16S rRNA gene sequences among J13 and other *Leuconostoc* spp., revealing that J13 is closely related to *Leuconostoc fallax*.
